# Supplementary material for: Accuracy of continuous glucose monitoring in preterm infants: a systematic review and meta-analysis
Source: HighWire-hosted journal article supplement (doi:10.1136/bmjopen-2020-045335), 2020-12-01
Supplement: bmjopen-2020-045335supp001_data_supplement.pdf [file bmjopen-2020-045335supp001_data_supplement.pdf]

## ONLINE-ONLY SUPPLEMENTS

**eFigure 1** CGM device

**eFigure 2** Prisma flow chart

**eTable 1 (a-e)** Data extraction: 3x3 contingency tables showing the paired glucose values between the reference standard and the index test. The threshold used for hypoglycaemia was  $<2.6$ mmol/L and for hyperglycaemia  $>10$ mmol/L.

**eTable 2** Characteristics of excluded studies

**eTable 3:** Included studies characteristics

**Search strategy**

**Microdialysis articles**

**eFigure 1** CGM device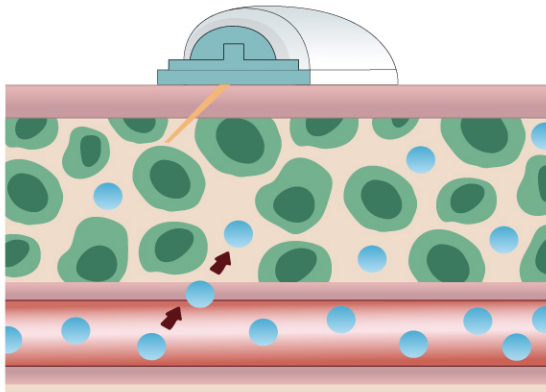

**eFigure 2** Prisma flow chart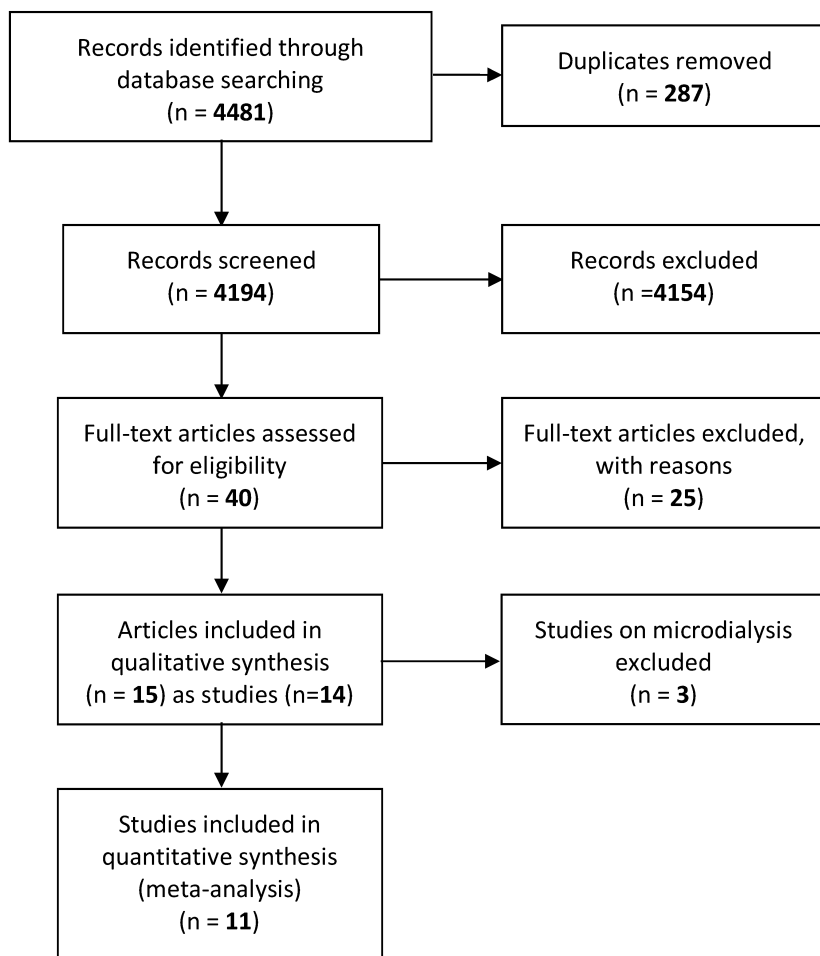

**eTable 1** Characteristics of excluded studies

| Study ID                                     | Reason for exclusion                                                        |
|----------------------------------------------|-----------------------------------------------------------------------------|
| Alonso et al. 2014 <sup>59</sup>             | Editorial                                                                   |
| Hay Jr et al. 2010 <sup>60</sup>             | Editorial                                                                   |
| Hernandez et al. 2019 <sup>61</sup>          | Editorial                                                                   |
| Beardsall et al. 2011                        | Duplicate of Beardsall et al. 2013 <sup>34</sup>                            |
| Beardsall et al. 2012                        | Duplicate of Beardsall et al. 2013 <sup>34</sup>                            |
| Bondy et al. 2018                            | Duplicate of Nally et al. 2018 <sup>38</sup>                                |
| Barrio Castellanos et al. 2010 <sup>62</sup> | Duplicate of Harris et al. 2010 <sup>32</sup> in Spanish                    |
| Thomson et al. 2018b                         | Duplicate of Thomson et al. <sup>46</sup>                                   |
| Harris DL et al, 2010 <sup>32</sup>          | Patients included are both term and preterm, stratified data not provided   |
| Conrad et al. 2004 <sup>63</sup>             | Patient age ranges from 6 months to 17 years                                |
| Stewart ZA et al. 2019 <sup>31</sup>         | Patients included are both term and preterm, stratified data not provided   |
| Wackernagel D et al. 2016 <sup>33</sup>      | One preterm patient, no hyper- hypoglycaemic events                         |
| McGlacken-Byrne et al. 2019 <sup>64</sup>    | Patients included are term infants                                          |
| Sanchez de Leon et al. 2012                  | Patients included are term infants                                          |
| Mizumoto et al. 2012                         | Abstract published in journal                                               |
| Mola Riehle et al. 2012                      | Abstract published in journal                                               |
| Wackernagel et al. 2012                      | Abstract published in journal                                               |
| Signal et al. 2011                           | Abstract published in journal                                               |
| Nakamura et al. 2016 <sup>65</sup>           | Case report                                                                 |
| Saha et al. 2018 <sup>66</sup>               | Case report                                                                 |
| Signal et al. 2012b                          | Poster for Signal et al. 2012 <sup>67</sup>                                 |
| Signal et al. 2012 <sup>67</sup>             | They study the effect of calibrating CGM devices                            |
| Javid et al. 2005 <sup>68</sup>              | They study Extracorporeal Glucose Monitoring System (EGMS), not CGM devices |
| Jagla et al. 2018 <sup>8</sup>               | They do not compare the CGM with any other glucose testing modality         |
| Tsao et al. 2017 <sup>69</sup>               | They study a type of intermittent glucose monitoring                        |

**eTable 2 (a-e)** Data extraction: 3x3 contingency tables showing the paired glucose values between the reference standard and the index test. The threshold used for hypoglycaemia was <2.6mmol/L and for hyperglycaemia >10mmol/L.

| <b>(a)</b> Pertierra-Cortada <sup>44</sup> |               | Reference standard (PoC) |               |               |
|--------------------------------------------|---------------|--------------------------|---------------|---------------|
| Index test (CGM)                           |               | Hypoglycemic             | Normoglycemic | Hyperglycemic |
|                                            | Hypoglycemic  | 0                        | 3             | 0             |
|                                            | Normoglycemic | 2                        | 402           | 0             |
|                                            | Hyperglycemic | 0                        | 0             | 0             |

  

| <b>(b)</b> Iglesias-Platas <sup>42</sup> |               | Reference standard (PoC) |               |               |
|------------------------------------------|---------------|--------------------------|---------------|---------------|
| Index test (CGM)                         |               | Hypoglycemic             | Normoglycemic | Hyperglycemic |
|                                          | Hypoglycemic  | 1                        | 2             | 0             |
|                                          | Normoglycemic | 9                        | 871           | 16            |
|                                          | Hyperglycemic | 0                        | 10            | 115           |

  

| <b>(c)</b> Tomotaki <sup>35</sup> |               | Reference standard (PoC) |               |               |
|-----------------------------------|---------------|--------------------------|---------------|---------------|
| Index test (CGM)                  |               | Hypoglycemic             | Normoglycemic | Hyperglycemic |
|                                   | Hypoglycemic  | 1                        | 0             | 0             |
|                                   | Normoglycemic | 3                        | 260           | 0             |
|                                   | Hyperglycemic | 0                        | 3             | 2             |

  

| <b>(d)</b> Nally <sup>38</sup> |               | Reference standard (PoC) |               |               |
|--------------------------------|---------------|--------------------------|---------------|---------------|
| Index test (CGM)               |               | Hypoglycemic             | Normoglycemic | Hyperglycemic |
|                                | Hypoglycemic  | 5                        | 5             | 0             |
|                                | Normoglycemic | 0                        | 49            | 0             |
|                                | Hyperglycemic | 0                        | 0             | 0             |

  

| <b>(e)</b> Tabery <sup>39</sup> |               | Reference standard (PoC) |               |               |
|---------------------------------|---------------|--------------------------|---------------|---------------|
| Index test (CGM)                |               | Hypoglycemic             | Normoglycemic | Hyperglycemic |
|                                 | Hypoglycemic  | 2                        | 6             | 0             |
|                                 | Normoglycemic | 0                        | 72            | 0             |
|                                 | Hyperglycemic | 0                        | 0             | 0             |

**eTable 3:** Included studies characteristics

|                                      | Reference standard                                                                                                                                                                                                                                                                                        | Adverse effect                                                                                                                                                                                                                                                                                                                                                                                                                                                                                                                                                                                                                                | Inclusion/exclusion criteria                                                                                                                                                                                                                                                                                                                                                                                       |
|--------------------------------------|-----------------------------------------------------------------------------------------------------------------------------------------------------------------------------------------------------------------------------------------------------------------------------------------------------------|-----------------------------------------------------------------------------------------------------------------------------------------------------------------------------------------------------------------------------------------------------------------------------------------------------------------------------------------------------------------------------------------------------------------------------------------------------------------------------------------------------------------------------------------------------------------------------------------------------------------------------------------------|--------------------------------------------------------------------------------------------------------------------------------------------------------------------------------------------------------------------------------------------------------------------------------------------------------------------------------------------------------------------------------------------------------------------|
| Beardsall 2005 <sup>13</sup>         | PoC: The Elite (Bayer, Munich, Germany) and Medisense (Abbott, Abbott Park, Illinois, USA) near patient glucose monitors.                                                                                                                                                                                 | In one baby of 23 weeks gestation, in whom 50/50 paraffin had been used because of very poor skin condition, the sensor fell out on two occasions and was therefore not replaced. In another baby (24 weeks gestation) a small area of superficial skin loss was noted 24 hours after sensor removal, but this healed well.                                                                                                                                                                                                                                                                                                                   | <b>Inclusion:</b> infants requiring intensive care and born <1500 g                                                                                                                                                                                                                                                                                                                                                |
| Beardsall 2013 <sup>34</sup>         | PoC: Leuven, Genk and Leeds, Radiometer (Radiometer Medical ApS, Denmark); Cambridge and Barcelona, Bayer Elite XL (Bayer, Germany); Luton, Medisense (Abbott, Illinois, USA), Amsterdam, HemoCue Glucose Analyser (HemoCue AB); and Edinburgh, Yellow Springs Instrument (YSI (UK), Hampshire, England). | Well tolerated<br><br>There were 4 controls, where CGMS data were not available, due to a combination of early death, or sensor failure.                                                                                                                                                                                                                                                                                                                                                                                                                                                                                                      | <b>Exclusion:</b> maternal diabetes and major fetal congenital abnormalities                                                                                                                                                                                                                                                                                                                                       |
| Iglesias-Platas 2009 <sup>42</sup>   | PoC: Ascensia Elite XL (Bayer Vital, Leverkusen, Germany) bedside monitor                                                                                                                                                                                                                                 | Well tolerated                                                                                                                                                                                                                                                                                                                                                                                                                                                                                                                                                                                                                                | <b>Exclusion:</b> babies born to diabetic mothers (both gestational and pre-existing diabetes); babies with any major congenital anomaly.                                                                                                                                                                                                                                                                          |
| Nally 2019 <sup>38</sup>             | Precision Xceed Pro Glucose Monitoring System (Abbott Laboratories, IL).<br>□□ Calibration - Contour Next Glucometer (Ascensia Diabetes Care, Parsippany, NJ).                                                                                                                                            | One infant had mild bleeding upon sensor placement that necessitated removal because of a sensor failure error. One infant retained the sensor wire upon removal of the sensor, which is a very rare, but known risk. This infant did not require any medical intervention related to the retained sensor wire. Early in the study, two additional sensors failed the initial warm-up period after insertion and were removed. This was avoided in future participants by repeating the sensor warm-up period and not removing the sensor.<br><br>Three infants were unable to complete the study because of sensor failures after placement. | <b>Inclusion:</b> infants born to mothers with a diagnosis of diabetes during pregnancy, including type A1 (diet-controlled gestational diabetes), type A2 (medication-controlled gestational diabetes), type 1 diabetes, or type 2 diabetes.<br><b>Exclusion:</b> birth before 34 weeks of gestation, weight <2000 g, or if the infant received a medication known to affect sensor values (i.e., acetaminophen). |
| Perri 2018 <sup>43</sup>             | PoC: Medtronic Stat Strip Xpress                                                                                                                                                                                                                                                                          | Well tolerated                                                                                                                                                                                                                                                                                                                                                                                                                                                                                                                                                                                                                                | <b>Inclusion:</b> VLBW and central line positioned to administer parenteral nutrition.<br><b>Exclusion:</b> newborns with major congenital abnormalities at birth or with skin diseases                                                                                                                                                                                                                            |
| Pertierra-Cortada 2014 <sup>44</sup> | PoC Ascensia Elite XL (Bayer Vital, Leverkusen, Germany)                                                                                                                                                                                                                                                  | Well tolerated                                                                                                                                                                                                                                                                                                                                                                                                                                                                                                                                                                                                                                | <b>Inclusion:</b> VPT infants (= <32 weeks) admitted to NICU and approaching discharge, which usually takes place after 35 weeks PMA and near 2 kg of weight.<br><b>Exclusion:</b> infants born to mothers with diabetes and with congenital anomalies or complications of prematurity requiring fluid restriction or continuous feedings                                                                          |
| Saw 2017 <sup>45</sup>               | A-line                                                                                                                                                                                                                                                                                                    | Well tolerated                                                                                                                                                                                                                                                                                                                                                                                                                                                                                                                                                                                                                                | <b>Exclusion:</b> premature infants born with any major congenital malformations, including chromosome abnormally, confirmed or suspected sepsis or                                                                                                                                                                                                                                                                |

|                             |                                                                                                                                                                                                  |                |                                                                                                                                                                                                                                                                                                                                                                                                                                                                                                                                                                                                  |
|-----------------------------|--------------------------------------------------------------------------------------------------------------------------------------------------------------------------------------------------|----------------|--------------------------------------------------------------------------------------------------------------------------------------------------------------------------------------------------------------------------------------------------------------------------------------------------------------------------------------------------------------------------------------------------------------------------------------------------------------------------------------------------------------------------------------------------------------------------------------------------|
|                             |                                                                                                                                                                                                  |                | pneumonia, in a terminal state on admission, umbilical anomaly, skin infection, or conditions that prevented sensor attachment                                                                                                                                                                                                                                                                                                                                                                                                                                                                   |
| Tabery 2018 <sup>39</sup>   | PoC/lab test (blood gas analyzer (ABL800; Radiometer Medical ApS; Brønshøj; Denmark) or by a blood glucose meter (Stat Strip; Nova Biomedical Corporation, Waltham, MA; USA)                     | Well tolerated | <b>Inclusion:</b> infants born to diabetic mothers, birth 35th week of gestation<br><b>Exclusion:</b> congenital developmental defects or perinatal asphyxia.                                                                                                                                                                                                                                                                                                                                                                                                                                    |
| Thomson 2019 <sup>46</sup>  | PoC: combination of arterial, venous or capillary samples and tested on the blood gas analyser (Cobas b221; Roche Diagnostics, UK), and the Nova StatStrip (Nova Biomedical, Massachusetts, USA) | Well tolerated | <b>Inclusion:</b> birth weight <1200g, age <48hours and written informed parental consent<br><b>Exclusion:</b> major congenital malformation, any underlying metabolic disorder or if mothers had diabetes mellitus.                                                                                                                                                                                                                                                                                                                                                                             |
| Tiberi 2016 <sup>47</sup>   | PoC (no information about the device)                                                                                                                                                            | Well tolerated | <b>Inclusion:</b> preterm infants at increased risk for neonatal dysglycemia for intrauterine growth-restricted (IUGR) infants, small for gestational age infants (SGA), very low birth weight (VLBW) infants, extremely low birth weight (ELBW) infants, infants of diabetic mothers, maternal treatment with beta-blockers, tocolytics, oral hypoglycemic therapy, large for gestational age (LGA) infants, asphyxiated infants, septic infants, polycythaemic infants, infants with feeding difficulties.<br><b>Exclusion:</b> major congenital abnormalities at birth or with skin diseases. |
| Tomotaki 2019 <sup>35</sup> | PoC: StatStrip Xpress900 (Nova Biomedical, Waltham, MA, USA).                                                                                                                                    | Well tolerated | <b>Inclusion:</b> at least one of the following: (i) symptomatic hypoglycemia; (ii) difficulty stopping i.v. continuous glucose infusion because of hypoglycemia; and (iii) difficulty stopping infusion of enteral feeding by a gastric tube because of hypoglycemia.<br><b>Exclusion:</b> serious congenital abnormality, skin condition that contraindicated insertion of the sensor, or absence of parental agreement                                                                                                                                                                        |

**Search strategy:**

PubMed: (("Blood Glucose"[Mesh] AND "Monitoring, Physiologic"[Mesh]) OR continuous glucose monitor\* OR CGM[Title/Abstract] OR "glucose control") AND (infant, newborn[MeSH] OR newborn\*[TIAB] OR "new born"[TIAB] OR "new borns"[TIAB] OR "newlyborn"[TIAB] OR baby\*[TIAB] OR babies\*[TIAB] OR premature[TIAB] OR prematurity[TIAB] OR preterm[TIAB] OR "pre term"[TIAB] OR "low birth weight";[TIAB] OR ";low birthweight";[TIAB] OR VLBW[TIAB] OR LBW[TIAB] OR infan\*[TIAB] OR pediatric[Title] OR neonat\*[TIAB])

Embase: (('blood glucose monitoring'/exp) OR ('monitoring'/exp AND 'glucose blood level'/exp) OR ('continuous glucose monitor\*' OR cgm:ti,ab OR (glucose NEAR/3 control\*) OR (glucose NEAR/3 monitor\*))) AND (('prematurity'/exp OR 'infant'/exp) OR (newborn\*:ti,ab OR 'new born':ti,ab OR 'new borns':ti,ab OR 'newly born':ti,ab OR baby\*:ti,ab OR babies:ti,ab OR premature:ti,ab OR prematurity:ti,ab OR preterm:ti,ab OR 'pre term':ti,ab OR 'low birth weight':ti,ab OR 'low birthweight':ti,ab OR vlbw:ti,ab OR lbw:ti,ab OR infant:ti,ab OR infants:ti,ab OR infantile:ti,ab OR infancy:ti,ab OR neonat\*:ti,ab))

CINAHL: (MH "Blood Glucose Monitoring+") OR (MH "Blood Glucose") AND (MH "Monitoring, Physiologic+") OR (continuous glucose monitor\* OR TI CGM OR AB CGM) OR (glucose N3 monitor\* OR glucose N3 control\*) AND ((infant or infants or infantile or infancy or newborn\* or "new born" or "new borns" or "newlyborn" or neonat\* or baby\* or babies or premature or prematures or prematurity or preterm or preterms or "pre term" or premies or "low birth weight" or "low birthweight" or VLBW or LBW))

Cochrane Library: (infant or infants or infantile or infancy or newborn\* or 'new born' or 'new borns' or 'newly born' or neonat\* or baby\* or babies or premature or prematures or prematurity or preterm or preterms or 'pre term' or premies or 'low birth weight' or 'low birthweight' or VLBW or LBW or ELBW or NICU) AND (([Blood Glucose] AND [Monitoring, Physiologic]) OR (continuous glucose monitor\* OR cgm OR 'glucose control'))



### ***Microdialysis articles***

Three studies from the 90's and early 2000's were about microdialysis used on infants<sup>36,37,40,41</sup>, a technique where a catheter was introduced in the subcutaneous skin to monitor the diffusion of small molecules from the blood to the extracellular space including, amongst others, glucose, urea and lactate. At the time this technique was new and the authors of these articles studied the device on patients at NICUs because they were keen to find an alternative method for monitoring glucose without drawing blood. Baumeister et al.<sup>40</sup> report that microdialysis might be used for glucose monitoring in infants during intensive care, but that further research is warranted. De Boer et al.<sup>36,37</sup> report that microdialysis might be used to monitor glucose in infants, and that the results are more accurate if the microdialysis device is calibrated. Hildingsson et al.<sup>41</sup> report a great similarity between serum glucose and the glucose level in the interstitial fluid, and that microdialysis might be implemented as a method for glucose monitoring in this population in the future. These studies fit our inclusion criteria and we were therefore unable to exclude them, however they are irrelevant for the clinical context of the present review and are therefore not included in the quantitative synthesis.

### ***Risk of bias in included studies***

Three of the eleven included studies had a high risk of bias on patient selection<sup>42,44,46</sup>, mainly because they excluded infants born to diabetic mothers and it was unclear why they choose to exclude a population of infants that are at risk of altered blood glucose. However, this exclusion was deemed to have a low impact on the applicability, because these infants constituted only a small portion of the total population of preterm infants. One study<sup>45</sup> had an unclear risk of bias on patient selection and considerable concern for applicability in the same domain, because they did not accurately report how the patients were recruited.

Risk of bias and applicability concerns were low with regard to the index tests used in the included studies.

Four studies out of eleven studies had high risk of bias regarding the reference standard<sup>35,38,43,45</sup>, because they used alarms on their CGM devices when the reading was above or below the pre-decided thresholds. In this case an additional PoC test would be performed. This leads to tests being more likely to be performed when the glucose level is pathological, and therefore constitutes a risk of partial verification bias.

Another concern in this domain was the level of accuracy of the reference standard devices. In fact, even if commonly used PoC devices may have a deviation from the true value of 10% to 30%<sup>48,49</sup>, we assumed those method of measurement as a reference standard, as they are the most frequently used in clinical practice in the NICU as compared to laboratory enzymatic methods due to being more readily available and less invasive than taking blood samples which must be sent to a laboratory. All but one study<sup>45</sup> used PoC glucometers as their reference standard. Considering that to determine the accuracy of a test by comparing it to an inaccurate reference could introduce a misclassification bias, we decided to define not at risk those PoC devices which satisfied the minimum accuracy requirements stated by the International Organization for Standardization (ISO)<sup>50</sup>. Seven studies<sup>13,34,35,38,42-44</sup> had high risk of bias<sup>51</sup>. One study<sup>47</sup> had unclear risk of bias because they did not report which brand of PoC device they used. The study of Saw et al.<sup>45</sup> used a laboratory enzymatic method as a reference standard, so it was considered at high risk of bias in this domain, because of the difference in accuracy that this method could have in respect of PoC devices<sup>48,49</sup>.

There was a high risk of bias regarding flow and timing in three studies<sup>13,34,39</sup> of the eleven included studies, as they used several different brands of PoC devices as their reference standard, each with a different level of accuracy<sup>16</sup>.
